# Supplementary material for: Gamma radiation crosslinking of PVA/myrrh resin thin film for improving the post-harvest time of lemon fruits
Source: Royal Society of Chemistry journal article supplement (doi:10.1039/d1ra09360f), 2022-01-01
Supplement: d1ra09360f1.pdf [file d1ra09360f1.pdf]

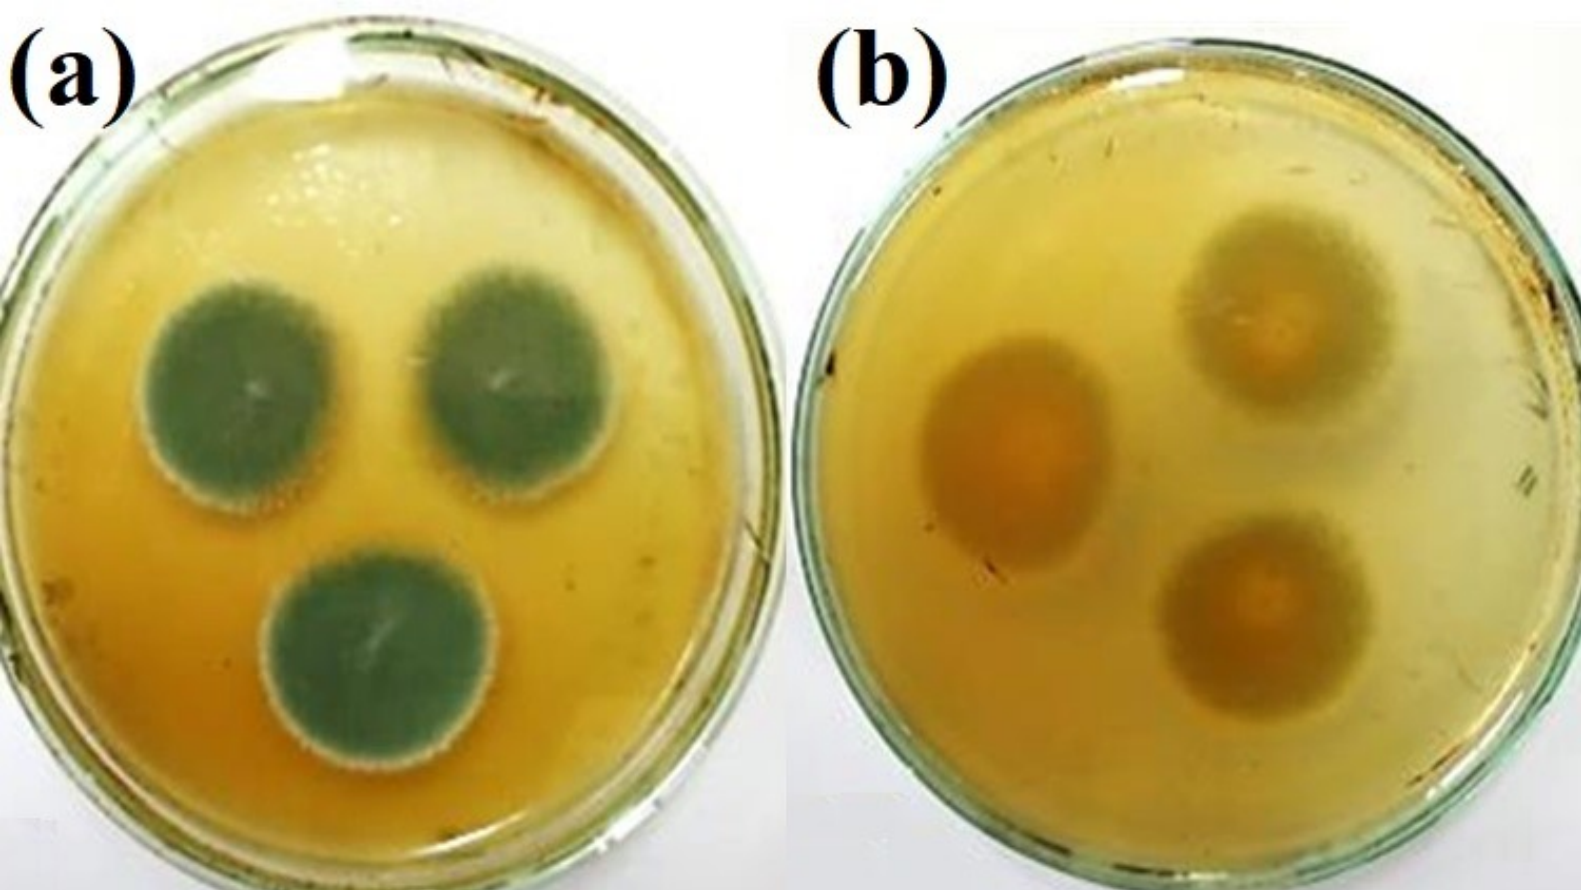

**Figure S1:** Colony of *Penicillium digitatum* on PDA grown for 6 days and incubated at  $24 \pm 1^\circ\text{C}$  showing the culture characteristics (a), and Reverse colony of *P. digitatum* (b).
